# Supplementary material
Source: MDPI journal article supplement (https://www.mdpi.com/2077-0472/11/9/896)
Supplement: s1 [file s1]

**Table S1.** Influence of experimental gradients on plant characteristics (Mean±SD)

| Factor     |                                       | Gradient | Plant height (m) | Ear insertion (m) | Leaf length (m) | Leaf width (cm) | Leaves number |
|------------|---------------------------------------|----------|------------------|-------------------|-----------------|-----------------|---------------|
| Year       | 2018                                  |          | 2.38 ±0.13       | 1.16 ±0.11        | 0.85 ±0.05      | 8.20 ±0.36      | 5.39 ±0.33    |
|            | 2019                                  |          | 2.66 ±0.07       | 1.04 ±0.09        | 0.85 ±0.03      | 9.63 ±0.39      | 5.94 ±0.29    |
|            | 2020                                  |          | 2.73 ±0.17       | 1.04 ±0.14        | 0.94 ±0.04      | 10.37 ±0.48     | 5.61 ±0.36    |
| Hybrid     | Turda 332                             |          | 2.57 ±0.25       | 1.09 ±0.11        | 0.89 ±0.06      | 9.51 ±1.07      | 5.60 ±0.42    |
|            | Turda 344                             |          | 2.66 ±0.17       | 1.14 ±0.13        | 0.89 ±0.06      | 9.37 ±1.00      | 5.59 ±0.38    |
|            | PR37N01                               |          | 2.54 ±0.14       | 1.01 ±0.11        | 0.86 ±0.05      | 9.31 ±0.90      | 5.75 ±0.38    |
| Fertilizer | Basal + CAN                           |          | 2.59 ±0.21       | 1.08 ±0.12        | 0.88 ±0.07      | 9.45 ±1.00      | 5.76 ±0.43    |
|            | Eurofertil Top 51 NPK + CAN           |          | 2.63 ±0.21       | 1.12 ±0.13        | 0.89 ±0.05      | 9.35 ±1.01      | 5.69 ±0.41    |
|            | Basal + Synertec NK35 N-process       |          | 2.60 ±0.20       | 1.09 ±0.15        | 0.89 ±0.06      | 9.47 ±1.05      | 5.59 ±0.33    |
|            | Basal + CAN + Fertiactyl Starter      |          | 2.58 ±0.21       | 1.07 ±0.13        | 0.87 ±0.05      | 9.34 ±1.04      | 5.61 ±0.41    |
|            | Basal + CAN + Rootip Basic + Energevo |          | 2.58 ±0.16       | 1.08 ±0.12        | 0.87 ±0.07      | 9.47 ±0.93      | 5.66 ±0.43    |
|            | NovaTec Classic                       |          | 2.56 ±0.21       | 1.05 ±0.11        | 0.87 ±0.05      | 9.31 ±0.99      | 5.57 ±0.38    |

**Table S2.** Influence of experimental gradients on agronomic productivity components of maize (Mean±SD)

| <b>Factor</b>     | <b>Gradient</b>                       | <b>TKG (g.)</b> | <b>HLM (kg/hl)</b> | <b>Yield (kg/ha)</b> |
|-------------------|---------------------------------------|-----------------|--------------------|----------------------|
| <b>Year</b>       | 2018                                  | 320.80 ±32.19   | 70.37 ±4.01        | 10,964.54 ±1095.09   |
|                   | 2019                                  | 254.11 ±33.38   | 68.04 ±9.26        | 7,482.28 ±579.03     |
|                   | 2020                                  | 307.41 ±38.96   | 68.96 ±3.96        | 12,432.48 ±979.08    |
| <b>Hybrid</b>     | Turda 332                             | 282.11 ±34.87   | 65.23 ±8.44        | 10,607.98 ±2657.89   |
|                   | Turda 344                             | 269.96 ±38.14   | 68.24 ±1.84        | 9,793.76 ±1992.58    |
|                   | PR37N01                               | 330.24 ±38.24   | 73.90 ±2.46        | 10,477.56 ±2059.38   |
| <b>Fertilizer</b> | Basal + CAN                           | 290.44 ±45.30   | 66.79 ±12.71       | 9,697.70 ±1918.74    |
|                   | Eurofertil Top 51 NPK + CAN           | 306.15 ±43.71   | 70.07 ±3.39        | 10,425.07 ±2289.76   |
|                   | Basal + Synertec NK35 N-process       | 296.93 ±46.26   | 70.17 ±3.52        | 10,547.00 ±2595.37   |
|                   | Basal + CAN + Fertiactyl Starter      | 294.37 ±53.02   | 68.74 ±4.75        | 10,269.85 ±2265.72   |
|                   | Basal + CAN + Rootip Basic + Energevo | 295.33 ±43.03   | 69.57 ±3.81        | 10,484.81 ±2299.45   |
|                   | NovaTec Classic                       | 281.41 ±39.22   | 69.40 ±3.78        | 10,334.15 ±2314.83   |

**Table S3.** Influence of experimental gradients on grain quality of maize (Mean±SD)

| Factor     |                                       | Gradient | Starch (%)  | Protein (%) |
|------------|---------------------------------------|----------|-------------|-------------|
| Year       | 2018                                  |          | 73.77 ±4.88 | 7.35 ±0.84  |
|            | 2019                                  |          | 60.80 ±1.67 | 8.39 ±0.71  |
|            | 2020                                  |          | 74.31 ±1.69 | 6.85 ±0.62  |
| Hybrid     | Turda 332                             |          | 68.80 ±5.99 | 7.10 ±0.87  |
|            | Turda 344                             |          | 69.68 ±8.15 | 7.97 ±1.08  |
|            | PR37N01                               |          | 70.39 ±6.72 | 7.53 ±0.73  |
| Fertilizer | Basal + CAN                           |          | 68.71 ±6.06 | 7.50 ±0.77  |
|            | Eurofertil Top 51 NPK + CAN           |          | 70.89 ±9.72 | 7.62 ±1.31  |
|            | Basal + Synertec NK35 N-process       |          | 69.75 ±7.30 | 7.65 ±1.18  |
|            | Basal + CAN + Fertiactyl Starter      |          | 68.76 ±6.65 | 7.62 ±0.55  |
|            | Basal + CAN + Rootip Basic + Energevo |          | 69.29 ±5.54 | 7.82 ±0.88  |
|            | NovaTec Classic                       |          | 70.37 ±6.32 | 6.98 ±0.77  |

**Table S4.** Influence of experimental gradients on disease and pest incidence (Mean±SE)

| Factor     | Gradient                              | <i>Fusarium</i> sp. (%) | <i>Ostrinia nubilalis</i> (%) |
|------------|---------------------------------------|-------------------------|-------------------------------|
| Year       | 2018                                  | 52.89 ±3.04             | 48.44 ±2.62                   |
|            | 2019                                  | 24.30 ±2.51             | 42.15 ±2.19                   |
|            | 2020                                  | 23.69 ±1.92             | 20.54 ±1.10                   |
| Hybrid     | Turda 332                             | 50.46 ±2.91             | 47.80 ±2.92                   |
|            | Turda 344                             | 30.04 ±2.66             | 36.80 ±2.48                   |
|            | PR37N01                               | 20.37 ±2.29             | 26.54 ±1.42                   |
| Fertilizer | Basal + CAN                           | 31.96 ±4.07             | 40.93 ±4.05                   |
|            | Eurofertil Top 51 NPK + CAN           | 32.56 ±4.33             | 39.52 ±3.35                   |
|            | Basal + Synertec NK35 N-process       | 37.19 ±4.75             | 41.30 ±4.12                   |
|            | Basal + CAN + Fertiactyl Starter      | 38.74 ±5.23             | 36.33 ±3.42                   |
|            | Basal + CAN + Rootip Basic + Energevo | 28.78 ±3.70             | 25.70 ±3.12                   |
|            | NovaTec Classic                       | 32.52 ±4.46             | 38.48 ±3.57                   |
